# Supplementary material for: The genome and genetics of a high oxidative stress tolerant Serratia sp. LCN16 isolated from the plant parasitic nematode Bursaphelenchus xylophilus
Source: PubMed Central journal article supplement (PMC4841953; doi:10.1186/s12864-016-2626-1), 2016-04-23
Supplement: 12864_2016_2626_MOESM1_ESM.pdf [file 12864_2016_2626_MOESM1_ESM.pdf]

| <b>Biological Processes - GO-id</b> | <b>GO-term</b>                                     | <b>#Seqs</b> |
|-------------------------------------|----------------------------------------------------|--------------|
| GO:0008152                          | metabolic process                                  | 1982         |
| GO:0009987                          | cellular process                                   | 1818         |
| GO:0044699                          | single-organism process                            | 1586         |
| GO:0051179                          | localization                                       | 736          |
| GO:0065007                          | biological regulation                              | 504          |
| GO:0050896                          | response to stimulus                               | 212          |
| GO:0071840                          | cellular component organization or biogenesis      | 128          |
| GO:0023052                          | signaling                                          | 95           |
| GO:0040011                          | locomotion                                         | 28           |
| GO:0022610                          | biological adhesion                                | 18           |
| GO:0032502                          | developmental process                              | 12           |
| GO:0051704                          | multi-organism process                             | 12           |
| GO:0007610                          | behavior                                           | 1            |
| GO:0000003                          | reproduction                                       | 1            |
| <b>Molecular Functions - GO-id</b>  | <b>GO-term</b>                                     | <b>#Seqs</b> |
| GO:0003824                          | catalytic activity                                 | 1852         |
| GO:0005488                          | binding                                            | 1344         |
| GO:0005215                          | transporter activity                               | 449          |
| GO:0001071                          | nucleic acid binding transcription factor activity | 293          |
| GO:0060089                          | molecular transducer activity                      | 80           |
| GO:0005198                          | structural molecule activity                       | 65           |
| GO:0009055                          | electron carrier activity                          | 49           |
| GO:0016209                          | antioxidant activity                               | 19           |
| GO:0000988                          | protein binding transcription factor activity      | 12           |
| GO:0098772                          | molecular function regulator                       | 8            |
| GO:0045182                          | translation regulator activity                     | 1            |
| GO:0045735                          | nutrient reservoir activity                        | 1            |
| <b>Cellular Components - GO-id</b>  | <b>GO-term</b>                                     | <b>#Seqs</b> |
| GO:0016020                          | membrane                                           | 892          |
| GO:0005623                          | cell                                               | 535          |
| GO:0032991                          | macromolecular complex                             | 161          |
| GO:0043226                          | organelle                                          | 88           |
| GO:0005576                          | extracellular region                               | 5            |
| GO:0031012                          | extracellular matrix                               | 3            |
| GO:0019012                          | virion                                             | 3            |
| GO:0009295                          | nucleoid                                           | 2            |
| GO:0031974                          | membrane-enclosed lumen                            | 1            |
