# Supplementary material for: The genome and genetics of a high oxidative stress tolerant Serratia sp. LCN16 isolated from the plant parasitic nematode Bursaphelenchus xylophilus
Source: PubMed Central journal article supplement (PMC4841953; doi:10.1186/s12864-016-2626-1), 2016-04-23

S1A

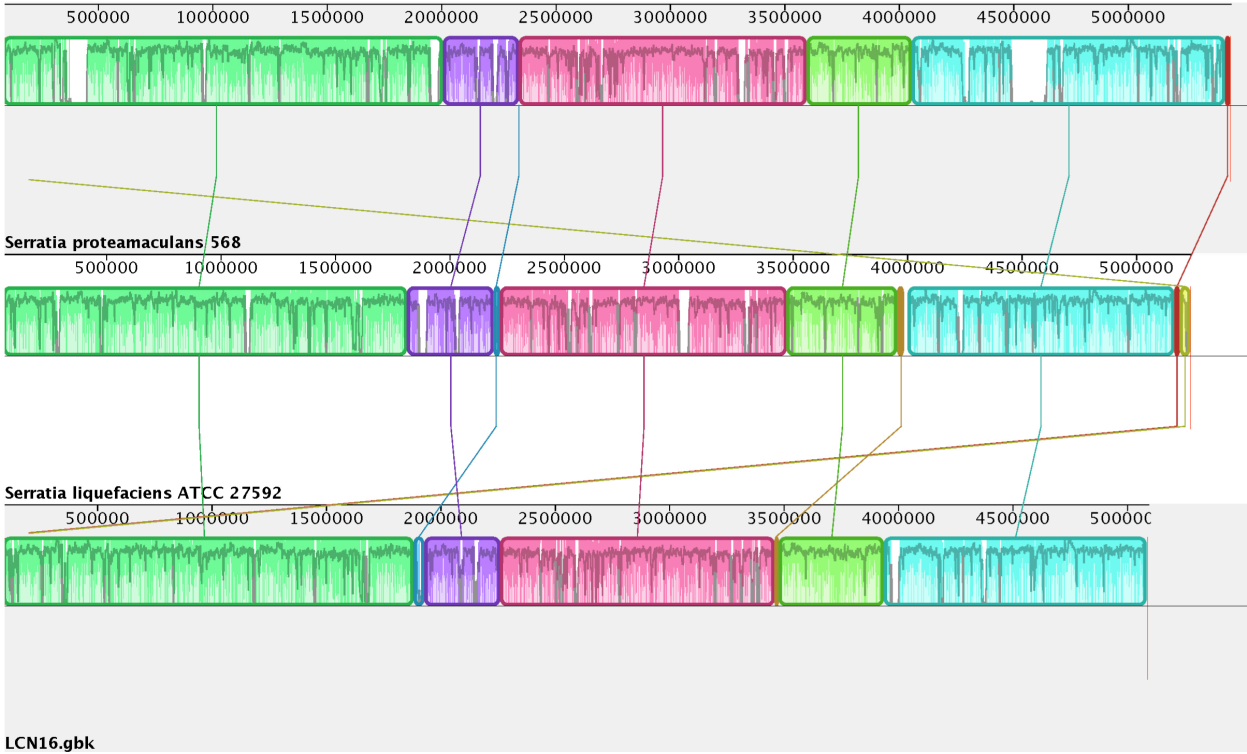

S1B

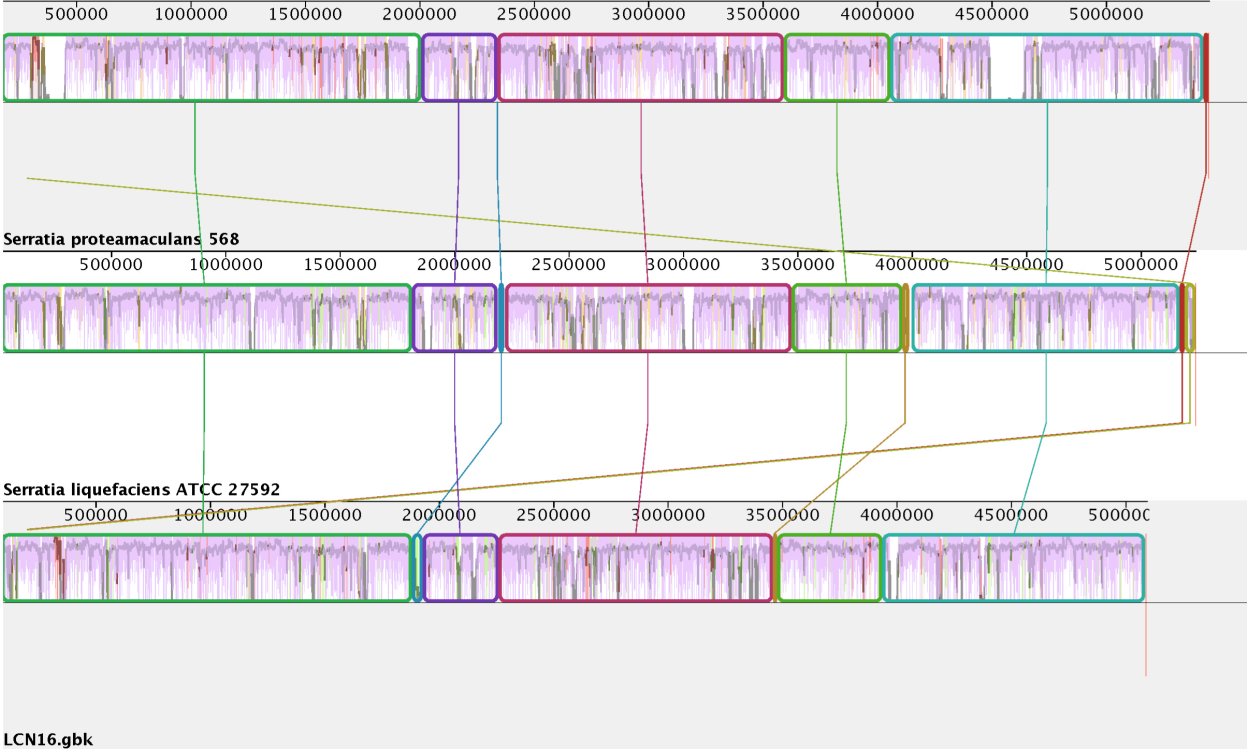

Supplement: 12864_2016_2626_MOESM2_ESM.pdf [file 12864_2016_2626_MOESM2_ESM.pdf]
