# Supplementary material for: The genome and genetics of a high oxidative stress tolerant Serratia sp. LCN16 isolated from the plant parasitic nematode Bursaphelenchus xylophilus
Source: PubMed Central journal article supplement (PMC4841953; doi:10.1186/s12864-016-2626-1), 2016-04-23
Supplement: 12864_2016_2626_MOESM3_ESM.pdf [file 12864_2016_2626_MOESM3_ESM.pdf]

| Island start | Island end | Length | Method           | Gene ID | Locus       | Gene start | Gene end | Strand | Product                                              |
|--------------|------------|--------|------------------|---------|-------------|------------|----------|--------|------------------------------------------------------|
| 120058       | 140469     | 20411  | IslandPath-DIMOB | ycyB    | LCN16_00106 | 120058     | 121257   | 1      | putative transporter YcyB                            |
| 120058       | 140469     | 20411  | IslandPath-DIMOB |         | LCN16_00107 | 121334     | 122680   | 1      | hypothetical protein                                 |
| 120058       | 140469     | 20411  | IslandPath-DIMOB | intS    | LCN16_00109 | 123051     | 124235   | 1      | Putative prophage CPS-53 integrase                   |
| 120058       | 140469     | 20411  | IslandPath-DIMOB |         | LCN16_00110 | 124232     | 125062   | 1      | hypothetical protein                                 |
| 120058       | 140469     | 20411  | IslandPath-DIMOB |         | LCN16_00111 | 125183     | 125479   | 1      | Prophage CP4-57 regulatory protein (AlpA)            |
| 120058       | 140469     | 20411  | IslandPath-DIMOB |         | LCN16_00112 | 125826     | 126002   | 1      | hypothetical protein                                 |
| 120058       | 140469     | 20411  | IslandPath-DIMOB |         | LCN16_00113 | 125995     | 126348   | 1      | hypothetical protein                                 |
| 120058       | 140469     | 20411  | IslandPath-DIMOB |         | LCN16_00114 | 126393     | 126674   | 1      | hypothetical protein                                 |
| 120058       | 140469     | 20411  | IslandPath-DIMOB |         | LCN16_00115 | 126671     | 127021   | 1      | hypothetical protein                                 |
| 120058       | 140469     | 20411  | IslandPath-DIMOB | traC    | LCN16_00116 | 127031     | 129712   | 1      | DNA primase TraC                                     |
| 120058       | 140469     | 20411  | IslandPath-DIMOB |         | LCN16_00117 | 130133     | 130882   | 1      | hypothetical protein                                 |
| 120058       | 140469     | 20411  | IslandPath-DIMOB |         | LCN16_00118 | 130885     | 131121   | 1      | DNA-binding transcriptional regulator                |
| 120058       | 140469     | 20411  | IslandPath-DIMOB |         | LCN16_00119 | 131423     | 132703   | 1      | Reverse transcriptase (RNA-dependent DNA polymerase) |
| 120058       | 140469     | 20411  | IslandPath-DIMOB |         | LCN16_00120 | 132694     | 134715   | 1      | Reverse transcriptase (RNA-dependent DNA polymerase) |
| 120058       | 140469     | 20411  | IslandPath-DIMOB | ydcR_1  | LCN16_00121 | 135248     | 136702   | -1     | putative HTH-type transcriptional regulator YdcR     |
| 120058       | 140469     | 20411  | IslandPath-DIMOB |         | LCN16_00122 | 136975     | 137547   | 1      | hypothetical protein                                 |
| 120058       | 140469     | 20411  | IslandPath-DIMOB | yiaW_1  | LCN16_00123 | 137708     | 138031   | 1      | Inner membrane protein YiaW                          |
| 120058       | 140469     | 20411  | IslandPath-DIMOB | yibH    | LCN16_00124 | 138037     | 139173   | 1      | Inner membrane protein YibH                          |
| 120058       | 140469     | 20411  | IslandPath-DIMOB | esaR    | LCN16_00125 | 139738     | 140469   | 1      | Transcriptional activator protein EsaR               |
| 365100       | 371737     | 6637   | SIGI-HMM         |         | LCN16_00325 | 365100     | 365348   | 1      | hypothetical protein                                 |

|        |        |       |                  |        |             |        |        |    |                                                        |
|--------|--------|-------|------------------|--------|-------------|--------|--------|----|--------------------------------------------------------|
| 365100 | 371737 | 6637  | SIGI-HMM         | prnA   | LCN16_00326 | 366011 | 367621 | 1  | Flavin-dependent tryptophan halogenase PrnA            |
| 365100 | 371737 | 6637  | SIGI-HMM         | prnB   | LCN16_00327 | 367621 | 368703 | 1  | Monodechloroaminopyrrolnitrin synthase PrnB            |
| 365100 | 371737 | 6637  | SIGI-HMM         | soxA   | LCN16_00328 | 368748 | 370451 | 1  | Monomeric sarcosine oxidase                            |
| 365100 | 371737 | 6637  | SIGI-HMM         | prnD   | LCN16_00329 | 370473 | 371567 | 1  | Aminopyrrolnitrin oxygenase PrnD                       |
| 365100 | 371737 | 6637  | SIGI-HMM         | rutF_1 | LCN16_00330 | 371567 | 371737 | 1  | FMN reductase (NADH) RutF                              |
| 365100 | 371737 | 6637  | SIGI-HMM         | nhaS3  | LCN16_00331 | 371734 | 372978 | 1  | High-affinity Na(+)/H(+) antiporter NhaS3              |
| 444162 | 448904 | 4742  | IslandPath-DIMOB | argR_1 | LCN16_00405 | 444568 | 445038 | -1 | Arginine repressor                                     |
| 444162 | 448904 | 4742  | IslandPath-DIMOB | mdh    | LCN16_00406 | 445504 | 446442 | 1  | Malate dehydrogenase                                   |
| 444162 | 448904 | 4742  | IslandPath-DIMOB |        | LCN16_00407 | 446511 | 446771 | -1 | DNA-binding transcriptional regulator Nlp              |
| 444162 | 448904 | 4742  | IslandPath-DIMOB |        | LCN16_00408 | 446953 | 447303 | 1  | Mu DNA-binding domain protein                          |
| 444162 | 448904 | 4742  | IslandPath-DIMOB | ispB   | LCN16_00409 | 447352 | 448323 | -1 | Octaprenyl-diphosphate synthase                        |
| 444162 | 448904 | 4742  | IslandPath-DIMOB | rpIU   | LCN16_00410 | 448593 | 448904 | 1  | 50S ribosomal protein L21                              |
| 547609 | 559681 | 5522  | SIGI-HMM         |        | LCN16_00509 | 554159 | 556597 | 1  | hypothetical protein                                   |
| 547609 | 559681 | 5522  | SIGI-HMM         |        | LCN16_00510 | 557333 | 557602 | 1  | hypothetical protein                                   |
| 547609 | 559681 | 5522  | SIGI-HMM         |        | LCN16_00511 | 557714 | 558046 | -1 | hypothetical protein                                   |
| 547609 | 559681 | 5522  | SIGI-HMM         |        | LCN16_00512 | 558067 | 558300 | -1 | hypothetical protein                                   |
| 547609 | 559681 | 5522  | SIGI-HMM         |        | LCN16_00513 | 558776 | 559681 | 1  | hypothetical protein                                   |
| 547609 | 560881 | 13272 | IslandPath-DIMOB | holC   | LCN16_00503 | 547623 | 548075 | -1 | DNA polymerase III subunit chi                         |
| 547609 | 560881 | 13272 | IslandPath-DIMOB | pepA_1 | LCN16_00504 | 548271 | 549782 | -1 | Cytosol aminopeptidase                                 |
| 547609 | 560881 | 13272 | IslandPath-DIMOB | lptF   | LCN16_00505 | 550063 | 551157 | 1  | Lipopolysaccharide export system permease protein LptF |
| 547609 | 560881 | 13272 | IslandPath-DIMOB | lptG   | LCN16_00506 | 551157 | 552227 | 1  | Lipopolysaccharide export system permease protein LptG |
| 547609 | 560881 | 13272 | IslandPath-DIMOB | intA_1 | LCN16_00508 | 552798 | 554060 | 1  | Prophage CP4-57 integrase                              |
| 547609 | 560881 | 13272 | IslandPath-DIMOB |        | LCN16_00509 | 554159 | 556597 | 1  | hypothetical protein                                   |

|         |         |       |                  |        |             |         |         |    |                                                                    |
|---------|---------|-------|------------------|--------|-------------|---------|---------|----|--------------------------------------------------------------------|
| 554159  | 560881  | 13272 | IslandPath-DIMOB |        | LCN16_00510 | 557333  | 557602  | 1  | hypothetical protein                                               |
| 554159  | 560881  | 13272 | IslandPath-DIMOB |        | LCN16_00511 | 557714  | 558046  | -1 | hypothetical protein                                               |
| 554159  | 560881  | 13272 | IslandPath-DIMOB |        | LCN16_00512 | 558067  | 558300  | -1 | hypothetical protein                                               |
| 554159  | 560881  | 13272 | IslandPath-DIMOB |        | LCN16_00513 | 558776  | 559681  | 1  | hypothetical protein                                               |
| 554159  | 560881  | 13272 | IslandPath-DIMOB | cynT_1 | LCN16_00514 | 560017  | 560652  | 1  | Carbonic anhydrase 1                                               |
| 1651616 | 1663703 | 12087 | SIGI-HMM         |        | LCN16_01543 | 1651616 | 1652656 | 1  | Polysaccharide biosynthesis/export protein                         |
| 1651616 | 1663703 | 12087 | SIGI-HMM         | wzb    | LCN16_01544 | 1652661 | 1653095 | 1  | Low molecular weight protein-tyrosine-phosphatase wzb              |
| 1651616 | 1663703 | 12087 | SIGI-HMM         | wzc_1  | LCN16_01545 | 1653108 | 1655279 | 1  | Tyrosine-protein kinase wzc                                        |
| 1651616 | 1663703 | 12087 | SIGI-HMM         |        | LCN16_01546 | 1655443 | 1656564 | 1  | Glycosyl transferases group 1                                      |
| 1651616 | 1663703 | 12087 | SIGI-HMM         |        | LCN16_01547 | 1656642 | 1658060 | 1  | hypothetical protein                                               |
| 1651616 | 1663703 | 12087 | SIGI-HMM         | mshA   | LCN16_01548 | 1658057 | 1659115 | 1  | D-inositol 3-phosphate glycosyltransferase                         |
| 1651616 | 1663703 | 12087 | SIGI-HMM         |        | LCN16_01549 | 1659173 | 1659904 | 1  | hypothetical protein                                               |
| 1651616 | 1663703 | 12087 | SIGI-HMM         | wcaJ   | LCN16_01550 | 1660481 | 1661914 | 1  | UDP-glucose:undecaprenyl-phosphate glucose-1-phosphate transferase |
| 1651616 | 1663703 | 12087 | SIGI-HMM         |        | LCN16_01551 | 1662096 | 1663703 | 1  | hypothetical protein                                               |
| 1672845 | 1677779 | 4934  | SIGI-HMM         | rfbX   | LCN16_01556 | 1672845 | 1674080 | 1  | Putative O-antigen transporter                                     |
| 1672845 | 1677779 | 4934  | SIGI-HMM         | glf    | LCN16_01557 | 1674080 | 1675177 | 1  | UDP-galactopyranose mutase                                         |
| 1672845 | 1677779 | 4934  | SIGI-HMM         |        | LCN16_01558 | 1675186 | 1676169 | 1  | hypothetical protein                                               |
| 1672845 | 1677779 | 4934  | SIGI-HMM         | manC1  | LCN16_01559 | 1676355 | 1677779 | 1  | Mannose-1-phosphate guanylyltransferase 1                          |
| 1682972 | 1695141 | 12169 | SIGI-HMM         | rmID_1 | LCN16_01565 | 1682972 | 1683835 | 1  | dTDP-4-dehydrorhamnose reductase                                   |
| 1682972 | 1695141 | 12169 | SIGI-HMM         |        | LCN16_01566 | 1683964 | 1684827 | 1  | hypothetical protein                                               |
| 1682972 | 1695141 | 12169 | SIGI-HMM         | rfbC   | LCN16_01567 | 1685390 | 1685923 | 1  | dTDP-4-dehydrorhamnose 3,5-epimerase                               |
| 1682972 | 1695141 | 12169 | SIGI-HMM         | rmID_2 | LCN16_01568 | 1686031 | 1686906 | 1  | dTDP-4-dehydrorhamnose reductase                                   |
| 1682972 | 1695141 | 12169 | SIGI-HMM         | tagG   | LCN16_01569 | 1686928 | 1687716 | 1  | Teichoic acid translocation permease protein TagG                  |
| 1682972 | 1695141 | 12169 | SIGI-HMM         | tagH   | LCN16_01570 | 1687706 | 1689097 | 1  | Teichoic acids export ATP-binding protein TagH                     |
| 1682972 | 1695141 | 12169 | SIGI-HMM         |        | LCN16_01571 | 1689090 | 1693106 | 1  | ?-D-glucose-1-phosphatase                                          |

|         |         |       |                  |        |             |         |         |    |                                                                  |
|---------|---------|-------|------------------|--------|-------------|---------|---------|----|------------------------------------------------------------------|
| 1682972 | 1695141 | 12169 | SIGI-HMM         |        | LCN16_01572 | 1693169 | 1694095 | 1  | putative glycosyl transferase                                    |
| 1682972 | 1695141 | 12169 | SIGI-HMM         | wbbL   | LCN16_01573 | 1694110 | 1694928 | 1  | N-acetylglucosaminyl-diphospho-decaprenol L-rhamnosyltransferase |
| 1682972 | 1695141 | 12169 | SIGI-HMM         |        | LCN16_01574 | 1694998 | 1695141 | 1  | hypothetical protein                                             |
| 1891045 | 1897317 | 6272  | SIGI-HMM         | xerD_1 | LCN16_01752 | 1891045 | 1892208 | -1 | Tyrosine recombinase XerD                                        |
| 1891045 | 1897317 | 6272  | SIGI-HMM         |        | LCN16_01753 | 1892590 | 1893258 | -1 | hypothetical protein                                             |
| 1891045 | 1897317 | 6272  | SIGI-HMM         |        | LCN16_01754 | 1893255 | 1893437 | -1 | hypothetical protein                                             |
| 1891045 | 1897317 | 6272  | SIGI-HMM         |        | LCN16_01755 | 1893453 | 1893842 | -1 | hypothetical protein                                             |
| 1891045 | 1897317 | 6272  | SIGI-HMM         |        | LCN16_01756 | 1894301 | 1894558 | -1 | hypothetical protein                                             |
| 1891045 | 1897317 | 6272  | SIGI-HMM         |        | LCN16_01757 | 1894617 | 1894982 | -1 | hypothetical protein                                             |
| 1891045 | 1897317 | 6272  | SIGI-HMM         |        | LCN16_01758 | 1894979 | 1895158 | -1 | hypothetical protein                                             |
| 1891045 | 1897317 | 6272  | SIGI-HMM         |        | LCN16_01759 | 1895161 | 1895565 | -1 | hypothetical protein                                             |
| 1891045 | 1897317 | 6272  | SIGI-HMM         |        | LCN16_01760 | 1895565 | 1895774 | -1 | hypothetical protein                                             |
| 1891045 | 1897317 | 6272  | SIGI-HMM         |        | LCN16_01761 | 1895771 | 1896199 | -1 | HNH endonuclease                                                 |
| 1891045 | 1897317 | 6272  | SIGI-HMM         |        | LCN16_01762 | 1896192 | 1896707 | -1 | hypothetical protein                                             |
| 1891045 | 1897317 | 6272  | SIGI-HMM         |        | LCN16_01763 | 1896694 | 1897317 | -1 | hypothetical protein                                             |
| 1891045 | 1897317 | 6272  | SIGI-HMM         |        | LCN16_01764 | 1897314 | 1897808 | -1 | hypothetical protein                                             |
| 1893258 | 1918661 | 25403 | IslandPath-DIMOB |        | LCN16_01754 | 1893255 | 1893437 | -1 | hypothetical protein                                             |
| 1893258 | 1918661 | 25403 | IslandPath-DIMOB |        | LCN16_01755 | 1893453 | 1893842 | -1 | hypothetical protein                                             |
| 1893258 | 1918661 | 25403 | IslandPath-DIMOB |        | LCN16_01756 | 1894301 | 1894558 | -1 | hypothetical protein                                             |
| 1893258 | 1918661 | 25403 | IslandPath-DIMOB |        | LCN16_01757 | 1894617 | 1894982 | -1 | hypothetical protein                                             |
| 1893258 | 1918661 | 25403 | IslandPath-DIMOB |        | LCN16_01758 | 1894979 | 1895158 | -1 | hypothetical protein                                             |
| 1893258 | 1918661 | 25403 | IslandPath-DIMOB |        | LCN16_01759 | 1895161 | 1895565 | -1 | hypothetical protein                                             |
| 1893258 | 1918661 | 25403 | IslandPath-DIMOB |        | LCN16_01760 | 1895565 | 1895774 | -1 | hypothetical protein                                             |
| 1893258 | 1918661 | 25403 | IslandPath-DIMOB |        | LCN16_01761 | 1895771 | 1896199 | -1 | HNH endonuclease                                                 |

|         |         |       |                  |  |             |         |         |    |                                                  |
|---------|---------|-------|------------------|--|-------------|---------|---------|----|--------------------------------------------------|
| 1893258 | 1918661 | 25403 | IslandPath-DIMOB |  | LCN16_01762 | 1896192 | 1896707 | -1 | hypothetical protein                             |
| 1893258 | 1918661 | 25403 | IslandPath-DIMOB |  | LCN16_01763 | 1896694 | 1897317 | -1 | hypothetical protein                             |
| 1893258 | 1918661 | 25403 | IslandPath-DIMOB |  | LCN16_01764 | 1897314 | 1897808 | -1 | hypothetical protein                             |
| 1893258 | 1918661 | 25403 | IslandPath-DIMOB |  | LCN16_01765 | 1897811 | 1897954 | -1 | hypothetical protein                             |
| 1893258 | 1918661 | 25403 | IslandPath-DIMOB |  | LCN16_01766 | 1897948 | 1898166 | -1 | hypothetical protein                             |
| 1893258 | 1918661 | 25403 | IslandPath-DIMOB |  | LCN16_01767 | 1898447 | 1898545 | -1 | hypothetical protein                             |
| 1893258 | 1918661 | 25403 | IslandPath-DIMOB |  | LCN16_01768 | 1898548 | 1898724 | -1 | hypothetical protein                             |
| 1893258 | 1918661 | 25403 | IslandPath-DIMOB |  | LCN16_01769 | 1898761 | 1899099 | -1 | hypothetical protein                             |
| 1893258 | 1918661 | 25403 | IslandPath-DIMOB |  | LCN16_01770 | 1899590 | 1899733 | 1  | hypothetical protein                             |
| 1893258 | 1918661 | 25403 | IslandPath-DIMOB |  | LCN16_01771 | 1899774 | 1900172 | -1 | hypothetical protein                             |
| 1893258 | 1918661 | 25403 | IslandPath-DIMOB |  | LCN16_01772 | 1900169 | 1900834 | -1 | hypothetical protein                             |
| 1893258 | 1918661 | 25403 | IslandPath-DIMOB |  | LCN16_01773 | 1901245 | 1901889 | -1 | putative HTH-type transcriptional regulator      |
| 1893258 | 1918661 | 25403 | IslandPath-DIMOB |  | LCN16_01774 | 1901981 | 1902208 | 1  | hypothetical protein                             |
| 1893258 | 1918661 | 25403 | IslandPath-DIMOB |  | LCN16_01775 | 1902224 | 1902550 | 1  | Bacteriophage CII protein                        |
| 1893258 | 1918661 | 25403 | IslandPath-DIMOB |  | LCN16_01776 | 1902834 | 1903598 | 1  | Phage antirepressor protein KilAC domain protein |
| 1893258 | 1918661 | 25403 | IslandPath-DIMOB |  | LCN16_01777 | 1903601 | 1903777 | 1  | hypothetical protein                             |
| 1893258 | 1918661 | 25403 | IslandPath-DIMOB |  | LCN16_01778 | 1903774 | 1904796 | 1  | hypothetical protein                             |
| 1893258 | 1918661 | 25403 | IslandPath-DIMOB |  | LCN16_01779 | 1904793 | 1905764 | 1  | hypothetical protein                             |
| 1893258 | 1918661 | 25403 | IslandPath-DIMOB |  | LCN16_01780 | 1906115 | 1906513 | 1  | Phage antitermination protein Q                  |
| 1893258 | 1918661 | 25403 | IslandPath-DIMOB |  | LCN16_01781 | 1906767 | 1906949 | 1  | hypothetical protein                             |
| 1893258 | 1918661 | 25403 | IslandPath-DIMOB |  | LCN16_01782 | 1906993 | 1907625 | 1  | hypothetical protein                             |

|         |         |       |                  |        |             |         |         |    |                                  |
|---------|---------|-------|------------------|--------|-------------|---------|---------|----|----------------------------------|
| 1893258 | 1918661 | 25403 | IslandPath-DIMOB |        | LCN16_01783 | 1907890 | 1908237 | 1  | hypothetical protein             |
| 1893258 | 1918661 | 25403 | IslandPath-DIMOB |        | LCN16_01784 | 1908508 | 1908861 | 1  | hypothetical protein             |
| 1893258 | 1918661 | 25403 | IslandPath-DIMOB |        | LCN16_01785 | 1908953 | 1909189 | 1  | Lysis protein S                  |
| 1893258 | 1918661 | 25403 | IslandPath-DIMOB | rrrD_1 | LCN16_01786 | 1909192 | 1909677 | 1  | Lysozyme RrrD                    |
| 1893258 | 1918661 | 25403 | IslandPath-DIMOB |        | LCN16_01787 | 1909674 | 1910048 | 1  | hypothetical protein             |
| 1893258 | 1918661 | 25403 | IslandPath-DIMOB | holE_1 | LCN16_01788 | 1910641 | 1910895 | 1  | DNA polymerase III subunit theta |
| 1893258 | 1918661 | 25403 | IslandPath-DIMOB |        | LCN16_01789 | 1910859 | 1910975 | -1 | hypothetical protein             |
| 1893258 | 1918661 | 25403 | IslandPath-DIMOB |        | LCN16_01790 | 1911048 | 1911167 | 1  | hypothetical protein             |
| 1893258 | 1918661 | 25403 | IslandPath-DIMOB |        | LCN16_01791 | 1911248 | 1911658 | 1  | hypothetical protein             |
| 1893258 | 1918661 | 25403 | IslandPath-DIMOB |        | LCN16_01792 | 1911758 | 1912435 | 1  | hypothetical protein             |
| 1893258 | 1918661 | 25403 | IslandPath-DIMOB |        | LCN16_01793 | 1912373 | 1912675 | -1 | hypothetical protein             |
| 1893258 | 1918661 | 25403 | IslandPath-DIMOB |        | LCN16_01794 | 1912820 | 1913035 | -1 | hypothetical protein             |
| 1893258 | 1918661 | 25403 | IslandPath-DIMOB |        | LCN16_01795 | 1913062 | 1913592 | 1  | Terminase small subunit          |
| 1893258 | 1918661 | 25403 | IslandPath-DIMOB |        | LCN16_01796 | 1913589 | 1914848 | 1  | Phage terminase large subunit    |
| 1893258 | 1918661 | 25403 | IslandPath-DIMOB |        | LCN16_01797 | 1914904 | 1915098 | 1  | hypothetical protein             |
| 1893258 | 1918661 | 25403 | IslandPath-DIMOB |        | LCN16_01798 | 1915154 | 1916482 | 1  | hypothetical protein             |
| 1893258 | 1918661 | 25403 | IslandPath-DIMOB |        | LCN16_01799 | 1916466 | 1917392 | 1  | Phage Mu protein F like protein  |
| 1893258 | 1918661 | 25403 | IslandPath-DIMOB |        | LCN16_01800 | 1917396 | 1918661 | 1  | hypothetical protein             |
| 1924033 | 1931063 | 7030  | SIGI-HMM         |        | LCN16_01810 | 1924033 | 1924242 | 1  | hypothetical protein             |
| 1924033 | 1931063 | 7030  | SIGI-HMM         |        | LCN16_01811 | 1924246 | 1925076 | 1  | hypothetical protein             |
| 1924033 | 1931063 | 7030  | SIGI-HMM         |        | LCN16_01812 | 1925224 | 1925373 | 1  | hypothetical protein             |
| 1924033 | 1931063 | 7030  | SIGI-HMM         |        | LCN16_01813 | 1925445 | 1926350 | -1 | hypothetical protein             |

|         |         |      |          |        |             |         |         |    |                                                              |
|---------|---------|------|----------|--------|-------------|---------|---------|----|--------------------------------------------------------------|
| 1924033 | 1931063 | 7030 | SIGI-HMM |        | LCN16_01814 | 1926511 | 1926795 | 1  | Arc-like DNA binding domain protein                          |
| 1924033 | 1931063 | 7030 | SIGI-HMM |        | LCN16_01815 | 1926905 | 1927186 | 1  | hypothetical protein                                         |
| 1924033 | 1931063 | 7030 | SIGI-HMM |        | LCN16_01816 | 1927255 | 1930437 | 1  | hypothetical protein                                         |
| 1924033 | 1931063 | 7030 | SIGI-HMM |        | LCN16_01817 | 1930440 | 1931063 | 1  | hypothetical protein                                         |
| 2150029 | 2158352 | 8323 | SIGI-HMM |        | LCN16_02045 | 2150029 | 2150928 | 1  | hypothetical protein                                         |
| 2150029 | 2158352 | 8323 | SIGI-HMM |        | LCN16_02046 | 2151182 | 2152684 | 1  | hypothetical protein                                         |
| 2150029 | 2158352 | 8323 | SIGI-HMM |        | LCN16_02047 | 2153053 | 2153484 | 1  | hypothetical protein                                         |
| 2150029 | 2158352 | 8323 | SIGI-HMM |        | LCN16_02048 | 2153539 | 2154168 | 1  | hypothetical protein                                         |
| 2150029 | 2158352 | 8323 | SIGI-HMM |        | LCN16_02049 | 2154334 | 2155458 | -1 | hypothetical protein                                         |
| 2150029 | 2158352 | 8323 | SIGI-HMM |        | LCN16_02050 | 2155439 | 2155684 | -1 | Excisionase-like protein                                     |
| 2150029 | 2158352 | 8323 | SIGI-HMM |        | LCN16_02051 | 2155684 | 2156181 | -1 | hypothetical protein                                         |
| 2150029 | 2158352 | 8323 | SIGI-HMM |        | LCN16_02052 | 2156561 | 2157049 | 1  | hypothetical protein                                         |
| 2150029 | 2158352 | 8323 | SIGI-HMM |        | LCN16_02053 | 2157495 | 2157785 | -1 | hypothetical protein                                         |
| 2150029 | 2158352 | 8323 | SIGI-HMM |        | LCN16_02054 | 2158068 | 2158352 | 1  | Acetyltransferase (GNAT) family protein                      |
| 2787314 | 2795303 | 7989 | SIGI-HMM |        | LCN16_02636 | 2787314 | 2788036 | 1  | ChaC-like protein                                            |
| 2787314 | 2795303 | 7989 | SIGI-HMM |        | LCN16_02637 | 2788140 | 2788604 | 1  | SnoaL-like polyketide cyclase                                |
| 2787314 | 2795303 | 7989 | SIGI-HMM | ada_1  | LCN16_02638 | 2788813 | 2789394 | 1  | Bifunctional transcriptional activator/DNA repair enzyme Ada |
| 2787314 | 2795303 | 7989 | SIGI-HMM |        | LCN16_02639 | 2789391 | 2790110 | 1  | hypothetical protein                                         |
| 2787314 | 2795303 | 7989 | SIGI-HMM | alkB_1 | LCN16_02640 | 2790113 | 2790763 | 1  | Alpha-ketoglutarate-dependent dioxygenase AlkB               |
| 2787314 | 2795303 | 7989 | SIGI-HMM |        | LCN16_02641 | 2790839 | 2791033 | 1  | hypothetical protein                                         |
| 2787314 | 2795303 | 7989 | SIGI-HMM | alkA_1 | LCN16_02642 | 2791079 | 2791729 | 1  | DNA-3-methyladenine glycosylase                              |
| 2787314 | 2795303 | 7989 | SIGI-HMM | ada_2  | LCN16_02643 | 2791808 | 2792878 | 1  | Bifunctional transcriptional activator/DNA repair enzyme Ada |
| 2787314 | 2795303 | 7989 | SIGI-HMM |        | LCN16_02644 | 2792893 | 2793585 | 1  | hypothetical protein                                         |
| 2787314 | 2795303 | 7989 | SIGI-HMM |        | LCN16_02645 | 2793602 | 2793907 | 1  | hypothetical protein                                         |
| 2787314 | 2795303 | 7989 | SIGI-HMM |        | LCN16_02646 | 2793904 | 2794665 | 1  | hypothetical protein                                         |
| 2787314 | 2795303 | 7989 | SIGI-HMM | lexA_1 | LCN16_02647 | 2794881 | 2795303 | 1  | LexA repressor                                               |

|         |         |       |                  |         |             |         |         |    |                                                            |
|---------|---------|-------|------------------|---------|-------------|---------|---------|----|------------------------------------------------------------|
| 3366019 | 3371308 | 5289  | SIGI-HMM         |         | LCN16_03205 | 3366019 | 3366234 | 1  | hypothetical protein                                       |
| 3366019 | 3371308 | 5289  | SIGI-HMM         | dnaJ_2  | LCN16_03206 | 3366519 | 3368021 | -1 | Chaperone protein DnaJ                                     |
| 3366019 | 3371308 | 5289  | SIGI-HMM         |         | LCN16_03207 | 3369443 | 3370039 | -1 | hypothetical protein                                       |
| 3366019 | 3371308 | 5289  | SIGI-HMM         |         | LCN16_03208 | 3370125 | 3370802 | 1  | HTH domain protein                                         |
| 3366019 | 3371308 | 5289  | SIGI-HMM         |         | LCN16_03209 | 3370862 | 3371308 | -1 | universal stress protein UspC                              |
| 3391931 | 3403430 | 11499 | SIGI-HMM         |         | LCN16_03227 | 3391931 | 3392473 | 1  | hypothetical protein                                       |
| 3391931 | 3403430 | 11499 | SIGI-HMM         | dmIR_33 | LCN16_03228 | 3392531 | 3393448 | -1 | HTH-type transcriptional regulator DmIR                    |
| 3391931 | 3403430 | 11499 | SIGI-HMM         | rpoD_1  | LCN16_03229 | 3395608 | 3397203 | -1 | RNA polymerase sigma factor RpoD                           |
| 3391931 | 3403430 | 11499 | SIGI-HMM         |         | LCN16_03230 | 3397805 | 3398731 | 1  | hypothetical protein                                       |
| 3391931 | 3403430 | 11499 | SIGI-HMM         | acr1    | LCN16_03231 | 3398893 | 3399636 | -1 | Fatty acyl-CoA reductase                                   |
| 3391931 | 3403430 | 11499 | SIGI-HMM         |         | LCN16_03232 | 3399832 | 3400293 | -1 | hypothetical protein                                       |
| 3391931 | 3403430 | 11499 | SIGI-HMM         | lexA_2  | LCN16_03233 | 3400689 | 3401081 | -1 | LexA repressor                                             |
| 3391931 | 3403430 | 11499 | SIGI-HMM         |         | LCN16_03234 | 3401214 | 3401630 | -1 | hypothetical protein                                       |
| 3391931 | 3403430 | 11499 | SIGI-HMM         | msbA_3  | LCN16_03235 | 3401676 | 3403430 | -1 | Lipid A export ATP-binding/permease protein MsbA           |
| 3977324 | 4016722 | 9531  | SIGI-HMM         |         | LCN16_03790 | 4007191 | 4007451 | -1 | hypothetical protein                                       |
| 3977324 | 4016722 | 9531  | SIGI-HMM         |         | LCN16_03791 | 4007608 | 4008171 | 1  | Bacteriophage CI repressor helix-turn-helix domain protein |
| 3977324 | 4016722 | 9531  | SIGI-HMM         | xerD_2  | LCN16_03792 | 4008175 | 4009242 | 1  | Tyrosine recombinase XerD                                  |
| 3977324 | 4016722 | 9531  | SIGI-HMM         |         | LCN16_03793 | 4009314 | 4009529 | -1 | hypothetical protein                                       |
| 3977324 | 4016722 | 9531  | SIGI-HMM         | intA_2  | LCN16_03794 | 4009694 | 4010416 | 1  | Prophage CP4-57 integrase                                  |
| 3977324 | 4016722 | 39398 | IslandPath-DIMOB | bamE    | LCN16_03751 | 3977324 | 3977662 | 1  | Outer membrane protein assembly factor BamE precursor      |
| 3977324 | 4016722 | 39398 | IslandPath-DIMOB | pasI    | LCN16_03752 | 3977777 | 3978061 | -1 | Persistence and stress-resistance antitoxin PasI           |
| 3977324 | 4016722 | 39398 | IslandPath-DIMOB | ratA    | LCN16_03753 | 3978042 | 3978488 | -1 | Ribosome association toxin RatA                            |
| 3977324 | 4016722 | 39398 | IslandPath-DIMOB | smpB    | LCN16_03754 | 3978650 | 3979132 | 1  | SsrA-binding protein                                       |
| 3977324 | 4016722 | 39398 | IslandPath-DIMOB |         | LCN16_03756 | 3979628 | 3979867 | -1 | hypothetical protein                                       |
| 3977324 | 4016722 | 39398 | IslandPath-DIMOB |         | LCN16_03757 | 3980574 | 3982229 | -1 | hypothetical protein                                       |



|         |         |       |                  |  |             |         |         |    |                                                         |
|---------|---------|-------|------------------|--|-------------|---------|---------|----|---------------------------------------------------------|
| 3977324 | 4016722 | 39398 | IslandPath-DIMOB |  | LCN16_03758 | 3982226 | 3982786 | -1 | hypothetical protein                                    |
| 3977324 | 4016722 | 39398 | IslandPath-DIMOB |  | LCN16_03759 | 3982761 | 3983483 | -1 | hypothetical protein                                    |
| 3977324 | 4016722 | 39398 | IslandPath-DIMOB |  | LCN16_03760 | 3983473 | 3984021 | -1 | Caudovirales tail fiber assembly protein                |
| 3977324 | 4016722 | 39398 | IslandPath-DIMOB |  | LCN16_03761 | 3984025 | 3987141 | -1 | Tail fiber protein                                      |
| 3977324 | 4016722 | 39398 | IslandPath-DIMOB |  | LCN16_03762 | 3987147 | 3987752 | -1 | hypothetical protein                                    |
| 3977324 | 4016722 | 39398 | IslandPath-DIMOB |  | LCN16_03763 | 3987745 | 3988929 | -1 | Baseplate J-like protein                                |
| 3977324 | 4016722 | 39398 | IslandPath-DIMOB |  | LCN16_03764 | 3988907 | 3989254 | -1 | hypothetical protein                                    |
| 3977324 | 4016722 | 39398 | IslandPath-DIMOB |  | LCN16_03765 | 3989254 | 3991785 | -1 | Phage-related minor tail protein                        |
| 3977324 | 4016722 | 39398 | IslandPath-DIMOB |  | LCN16_03766 | 3991973 | 3992242 | -1 | hypothetical protein                                    |
| 3977324 | 4016722 | 39398 | IslandPath-DIMOB |  | LCN16_03767 | 3992390 | 3992734 | -1 | hypothetical protein                                    |
| 3977324 | 4016722 | 39398 | IslandPath-DIMOB |  | LCN16_03768 | 3992734 | 3993075 | -1 | hypothetical protein                                    |
| 3977324 | 4016722 | 39398 | IslandPath-DIMOB |  | LCN16_03769 | 3993062 | 3993364 | -1 | Phage holin family 2                                    |
| 3977324 | 4016722 | 39398 | IslandPath-DIMOB |  | LCN16_03770 | 3993374 | 3993829 | -1 | hypothetical protein                                    |
| 3977324 | 4016722 | 39398 | IslandPath-DIMOB |  | LCN16_03771 | 3993826 | 3994950 | -1 | hypothetical protein                                    |
| 3977324 | 4016722 | 39398 | IslandPath-DIMOB |  | LCN16_03772 | 3994947 | 3995657 | -1 | Phage virion morphogenesis family protein               |
| 3977324 | 4016722 | 39398 | IslandPath-DIMOB |  | LCN16_03773 | 3995654 | 3996157 | -1 | P2 phage tail completion protein R (GpR)                |
| 3977324 | 4016722 | 39398 | IslandPath-DIMOB |  | LCN16_03774 | 3996154 | 3996606 | -1 | Phage head completion protein (GPL)                     |
| 3977324 | 4016722 | 39398 | IslandPath-DIMOB |  | LCN16_03775 | 3996706 | 3997410 | -1 | Phage small terminase subunit                           |
| 3977324 | 4016722 | 39398 | IslandPath-DIMOB |  | LCN16_03776 | 3997417 | 3998433 | -1 | Phage major capsid protein, P2 family                   |
| 3977324 | 4016722 | 39398 | IslandPath-DIMOB |  | LCN16_03777 | 3998482 | 3999321 | -1 | Phage capsid scaffolding protein (GPO) serine peptidase |
| 3977324 | 4016722 | 39398 | IslandPath-DIMOB |  | LCN16_03778 | 3999631 | 4001268 | 1  | Terminase-like family protein                           |

|         |         |       |                  |        |             |         |         |    |                                                            |
|---------|---------|-------|------------------|--------|-------------|---------|---------|----|------------------------------------------------------------|
| 3977324 | 4016722 | 39398 | IslandPath-DIMOB |        | LCN16_03779 | 4001265 | 4002314 | 1  | Phage portal protein                                       |
| 3977324 | 4016722 | 39398 | IslandPath-DIMOB |        | LCN16_03780 | 4002365 | 4002637 | 1  | Ogr/Delta-like zinc finger                                 |
| 3977324 | 4016722 | 39398 | IslandPath-DIMOB |        | LCN16_03781 | 4002608 | 4002826 | -1 | hypothetical protein                                       |
| 3977324 | 4016722 | 39398 | IslandPath-DIMOB |        | LCN16_03782 | 4002917 | 4004926 | -1 | Bacteriophage replication gene A protein (GPA)             |
| 3977324 | 4016722 | 39398 | IslandPath-DIMOB |        | LCN16_03783 | 4004920 | 4005189 | -1 | hypothetical protein                                       |
| 3977324 | 4016722 | 39398 | IslandPath-DIMOB |        | LCN16_03784 | 4005198 | 4005305 | -1 | hypothetical protein                                       |
| 3977324 | 4016722 | 39398 | IslandPath-DIMOB |        | LCN16_03785 | 4005287 | 4005526 | -1 | hypothetical protein                                       |
| 3977324 | 4016722 | 39398 | IslandPath-DIMOB |        | LCN16_03786 | 4005604 | 4006011 | -1 | hypothetical protein                                       |
| 3977324 | 4016722 | 39398 | IslandPath-DIMOB |        | LCN16_03787 | 4006014 | 4006433 | -1 | hypothetical protein                                       |
| 3977324 | 4016722 | 39398 | IslandPath-DIMOB |        | LCN16_03788 | 4006436 | 4006639 | -1 | hypothetical protein                                       |
| 3977324 | 4016722 | 39398 | IslandPath-DIMOB |        | LCN16_03789 | 4006649 | 4007158 | -1 | Phage regulatory protein CII (CP76)                        |
| 3977324 | 4016722 | 39398 | IslandPath-DIMOB |        | LCN16_03790 | 4007191 | 4007451 | -1 | hypothetical protein                                       |
| 3977324 | 4016722 | 39398 | IslandPath-DIMOB |        | LCN16_03791 | 4007608 | 4008171 | 1  | Bacteriophage CI repressor helix-turn-helix domain protein |
| 3977324 | 4016722 | 39398 | IslandPath-DIMOB | xerD_2 | LCN16_03792 | 4008175 | 4009242 | 1  | Tyrosine recombinase XerD                                  |
| 3977324 | 4016722 | 39398 | IslandPath-DIMOB |        | LCN16_03793 | 4009314 | 4009529 | -1 | hypothetical protein                                       |
| 3977324 | 4016722 | 39398 | IslandPath-DIMOB | intA_2 | LCN16_03794 | 4009694 | 4010416 | 1  | Prophage CP4-57 integrase                                  |
| 3977324 | 4016722 | 39398 | IslandPath-DIMOB |        | LCN16_03795 | 4010786 | 4013506 | 1  | hypothetical protein                                       |
| 4007191 | 4016722 | 9531  | SIGI-HMM         |        | LCN16_03795 | 4010786 | 4013506 | 1  | hypothetical protein                                       |
| 4007191 | 4016722 | 9531  | SIGI-HMM         |        | LCN16_03796 | 4013639 | 4013845 | 1  | hypothetical protein                                       |
| 4007191 | 4016722 | 9531  | SIGI-HMM         |        | LCN16_03797 | 4014198 | 4014545 | -1 | hypothetical protein                                       |
| 4007191 | 4016722 | 9531  | SIGI-HMM         |        | LCN16_03798 | 4014738 | 4014872 | -1 | hypothetical protein                                       |
| 4007191 | 4016722 | 9531  | SIGI-HMM         |        | LCN16_03799 | 4014918 | 4015613 | 1  | hypothetical protein                                       |

|         |         |       |                  |        |             |         |         |    |                                           |
|---------|---------|-------|------------------|--------|-------------|---------|---------|----|-------------------------------------------|
| 4007191 | 4016722 | 9531  | SIGI-HMM         | zinT   | LCN16_03800 | 4016072 | 4016722 | 1  | Metal-binding protein ZinT precursor      |
| 4007191 | 4016722 | 39398 | IslandPath-DIMOB |        | LCN16_03796 | 4013639 | 4013845 | 1  | hypothetical protein                      |
| 4007191 | 4016722 | 39398 | IslandPath-DIMOB |        | LCN16_03797 | 4014198 | 4014545 | -1 | hypothetical protein                      |
| 4007191 | 4016722 | 39398 | IslandPath-DIMOB |        | LCN16_03798 | 4014738 | 4014872 | -1 | hypothetical protein                      |
| 4007191 | 4016722 | 39398 | IslandPath-DIMOB |        | LCN16_03799 | 4014918 | 4015613 | 1  | hypothetical protein                      |
| 4007191 | 4016722 | 39398 | IslandPath-DIMOB | zinT   | LCN16_03800 | 4016072 | 4016722 | 1  | Metal-binding protein ZinT precursor      |
| 4208425 | 4214408 | 5983  | SIGI-HMM         | hisN   | LCN16_03983 | 4208425 | 4209237 | -1 | Histidinol-phosphatase                    |
| 4208425 | 4214408 | 5983  | SIGI-HMM         |        | LCN16_03984 | 4209552 | 4210094 | -1 | NUDIX domain protein                      |
| 4208425 | 4214408 | 5983  | SIGI-HMM         | kanB   | LCN16_03985 | 4210250 | 4211473 | -1 | 2'-deamino-2'-hydroxyneamine transaminase |
| 4208425 | 4214408 | 5983  | SIGI-HMM         | asnO   | LCN16_03986 | 4211492 | 4212532 | -1 | L-asparagine oxygenase                    |
| 4208425 | 4214408 | 5983  | SIGI-HMM         | mdtL_2 | LCN16_03987 | 4213239 | 4214408 | 1  | Multidrug resistance protein MdtL         |
| 4941042 | 4945478 | 4436  | SIGI-HMM         |        | LCN16_04651 | 4941042 | 4941200 | -1 | BetR domain protein                       |
| 4941042 | 4945478 | 4436  | SIGI-HMM         |        | LCN16_04652 | 4943169 | 4943702 | 1  | hypothetical protein                      |
| 4941042 | 4945478 | 4436  | SIGI-HMM         |        | LCN16_04653 | 4944852 | 4945478 | 1  | hypothetical protein                      |
| 4941042 | 4945478 | 4436  | SIGI-HMM         |        | LCN16_04654 | 4945401 | 4948502 | -1 | Extracellular serine protease precursor   |
