# Supplementary material for: The genome and genetics of a high oxidative stress tolerant Serratia sp. LCN16 isolated from the plant parasitic nematode Bursaphelenchus xylophilus
Source: PubMed Central journal article supplement (PMC4841953; doi:10.1186/s12864-016-2626-1), 2016-04-23
Supplement: 12864_2016_2626_MOESM4_ESM.pdf [file 12864_2016_2626_MOESM4_ESM.pdf]

| Function                 | Gene reference |             | KEGG annotation | Description               |
|--------------------------|----------------|-------------|-----------------|---------------------------|
|                          | Name           | Number      |                 |                           |
| ABC Transporters         |                |             |                 |                           |
| Iron (III) transporter   | <i>afuA</i>    | LCN16_02557 | K02012          | substrate-binding protein |
|                          |                | LCN16_03143 |                 |                           |
|                          |                | LCN16_04047 |                 |                           |
|                          | <i>afuB</i>    | LCN16_02558 | K02011          | permease protein          |
|                          |                | LCN16_03144 |                 |                           |
|                          |                | LCN16_04046 |                 |                           |
|                          | <i>afuC</i>    | LCN16_02559 | K02010          | ATP-binding protein       |
|                          |                | LCN16_03145 |                 |                           |
|                          |                | LCN16_04045 |                 |                           |
| Putrescine transporter   | <i>potF</i>    | LCN16_01614 | K11073          | substrate-binding protein |
|                          | <i>potG</i>    | LCN16_01615 | K11076          | ATP-binding protein       |
|                          | <i>potH</i>    | LCN16_01616 | K11075          | permease protein          |
|                          | <i>potI</i>    | LCN16_01617 | K11074          | permease protein          |
| Spermidine/putrescine    |                | LCN16_03709 | K02055          | substrate-binding protein |
|                          |                | LCN16_04432 | K02055          |                           |
|                          |                | LCN16_03706 | K02053          | permease protein          |
|                          |                | LCN16_04429 | K02053          |                           |
|                          |                | LCN16_03707 | K02054          |                           |
|                          |                | LCN16_04430 | K02054          |                           |
|                          |                | LCN16_03708 | K02052          |                           |
|                          |                | LCN16_04428 | K02052          | ATP-binding protein       |
|                          |                |             |                 |                           |
| Iron complex transporter |                | LCN16_00483 | K02016          | substrate-binding protein |
|                          |                | LCN16_00935 |                 |                           |
|                          |                | LCN16_01231 |                 |                           |
|                          |                | LCN16_01361 |                 |                           |
|                          |                | LCN16_02183 |                 |                           |
|                          |                | LCN16_03258 |                 |                           |
|                          |                | LCN16_03495 |                 |                           |
|                          |                | LCN16_04075 |                 |                           |
|                          |                | LCN16_00482 | K02015          | permease protein          |
|                          |                | LCN16_01233 |                 |                           |
|                          |                | LCN16_01317 |                 |                           |
|                          |                | LCN16_02182 |                 |                           |
|                          |                | LCN16_03260 |                 |                           |

|                                  |             |             |        |                                                                                |
|----------------------------------|-------------|-------------|--------|--------------------------------------------------------------------------------|
|                                  |             | LCN16_03497 |        |                                                                                |
|                                  |             | LCN16_03498 |        |                                                                                |
|                                  |             | LCN16_04074 |        |                                                                                |
|                                  |             | LCN16_00484 | K02013 | ATP-binding protein                                                            |
|                                  |             | LCN16_01234 |        |                                                                                |
|                                  |             | LCN16_01318 |        |                                                                                |
|                                  |             | LCN16_02181 |        |                                                                                |
|                                  |             | LCN16_03259 |        |                                                                                |
|                                  |             | LCN16_03499 |        |                                                                                |
|                                  |             | LCN16_04076 |        |                                                                                |
| Manganese/iron                   | <i>sitA</i> | LCN16_02147 | K11604 | substrate-binding protein                                                      |
|                                  | <i>sitC</i> | LCN16_02145 | K11605 | permease protein                                                               |
|                                  | <i>sitD</i> | LCN16_02144 | K11606 |                                                                                |
|                                  | <i>sitB</i> | LCN16_02146 | K11607 | ATP-binding protein                                                            |
| Electrochemical potential-driven | <i>efeU</i> | LCN16_02958 | K07243 | high-affinity iron transporter                                                 |
|                                  | <i>efeO</i> | LCN16_02957 | K07224 | iron uptake system                                                             |
|                                  | <i>efeB</i> | LCN16_02956 | K16301 | deferrochelataase/peroxidase                                                   |
| Others                           | <i>feoA</i> | LCN16_04566 | K04758 | ferrous iron transport protein                                                 |
|                                  | <i>feoB</i> | LCN16_04567 | K04759 |                                                                                |
|                                  | <i>feoC</i> | LCN16_04568 | K07490 |                                                                                |
| <b>Motility and Chemotaxis</b>   |             |             |        |                                                                                |
|                                  | <i>cheA</i> | LCN16_03016 | K03407 | two-component system, chemotaxis family, sensor kinase CheA [EC:2.7.13.3]      |
|                                  | <i>cheW</i> | LCN16_03015 | K03408 | purine-binding chemotaxis protein CheW                                         |
|                                  | <i>cheR</i> | LCN16_03012 | K00575 | chemotaxis protein methyltransferase CheR [EC:2.1.1.80]                        |
|                                  | <i>cheB</i> | LCN16_03011 | K03412 | two-component system, chemotaxis family, response regulator CheB [EC:3.1.1.61] |
|                                  | <i>cheY</i> | LCN16_03010 | K03413 | two-component system, chemotaxis family, response regulator CheY               |
|                                  | <i>cheZ</i> | LCN16_03009 | K03414 | chemotaxis protein CheZ                                                        |
|                                  | <i>mcp</i>  | LCN16_02979 | K03406 | Methyl-accepting chemotaxis protein I                                          |
|                                  | <i>tsr</i>  | LCN16_03014 | K05874 | tsr; methyl-accepting chemotaxis protein I, serine sensor receptor             |
|                                  | <i>tar</i>  | LCN16_00083 | K05877 | tap; methyl-accepting chemotaxis protein IV, peptide sensor receptor           |
|                                  | <i>tap</i>  | LCN16_03013 | K05877 | tap; methyl-accepting chemotaxis protein IV, peptide sensor receptor           |
| <b>Adhesion</b>                  |             |             |        |                                                                                |
|                                  | <i>fhaB</i> | LCN16_04167 | K1525  | filamentous hemagglutinin                                                      |
|                                  | <i>fhaB</i> | LCN16_04346 | K1526  | filamentous hemagglutinin                                                      |
| <b>Plant polymer degradation</b> |             |             |        |                                                                                |
|                                  |             | LCN16_00161 | K01179 | endoglucanase [EC:3.2.1.4]                                                     |

|                        |             |             |                                              |                                                    |
|------------------------|-------------|-------------|----------------------------------------------|----------------------------------------------------|
|                        | <i>uxaA</i> | LCN16_04263 | K01686                                       | mannonate dehydratase                              |
|                        | <i>uxaC</i> | LCN16_04264 | K00040                                       | fructuronate reductase                             |
| Plant growth promotion |             |             |                                              |                                                    |
| Nitrogen metabolism    | <i>glnL</i> | LCN16_04783 |                                              | two-component regulatory system                    |
|                        | <i>glnG</i> | LCN16_04784 |                                              | two-component regulatory system                    |
|                        | <i>narX</i> | LCN16_02937 |                                              | nitrogen respiration                               |
|                        | <i>narL</i> | LCN16_02938 |                                              | nitrogen respiration                               |
|                        | <i>narQ</i> | LCN16_03562 |                                              | nitrate respiration                                |
|                        | <i>narP</i> | LCN16_03563 |                                              | nitrate respiration                                |
| Siderophore            | <i>entC</i> | LCN16_03494 | K02364                                       | enterobactin synthetase component F                |
|                        | <i>entE</i> | LCN16_03493 | K02363                                       | 2,3-dihydro-2,3-dihydroxybenzoate-AMP ligase       |
|                        | <i>entA</i> | LCN16_03491 | K02361                                       | 2,3-dihydro-2,3-dihydroxybenzoate dehydrogenase    |
|                        | <i>entF</i> | LCN16_00890 | K02364                                       | enterobactin synthetase component F                |
|                        |             | LCN16_03500 |                                              |                                                    |
|                        | <i>exbD</i> | LCN16_00528 | K03558                                       | Biopolymer transport protein ExbD                  |
|                        |             | LCN16_04176 | K03559                                       | Biopolymer transport protein ExbD                  |
|                        | <i>exbB</i> | LCN16_00531 | K03561                                       | Biopolymer transport protein ExbB                  |
|                        |             | LCN16_04177 | K03562                                       | Biopolymer transport protein ExbB                  |
|                        | <i>bfr</i>  | LCN16_04493 | K03594                                       | bacterioferritin                                   |
|                        | <i>menF</i> | LCN16_03345 | K02552                                       | menaquinone-specific isochorismate synthase        |
| <i>pchB</i>            | LCN16_03570 | K04782      | isochorismate pyruvate lyase                 |                                                    |
| IAA                    | <i>ipdC</i> | LCN16_00911 | K04103                                       | indole-3-pyruvate decarboxylase                    |
|                        |             | LCN16_03478 |                                              |                                                    |
|                        | <i>budA</i> | LCN16_03505 | K01575                                       | Acetolactate decarboxylase                         |
|                        | <i>budB</i> | LCN16_03506 | K01652                                       | Acetolactate synthase, catabolic                   |
|                        | <i>budC</i> | LCN16_02073 | K18009                                       | (S,S)-butanediol dehydrogenase (acetoin reductase) |
| Aromatic Degradation   | <i>aaeA</i> | LCN16_04337 | K15548                                       | p-hydroxybenzoic acid efflux pump                  |
|                        | <i>aaeB</i> | LCN16_04336 | K03468                                       | p-hydroxybenzoic acid efflux pump                  |
|                        | <i>catA</i> | LCN16_03045 | K03381                                       | catechol 1,2-dioxygenase                           |
|                        | <i>catB</i> | LCN16_03043 | K01856                                       | muconate D-isomerase                               |
|                        | <i>catC</i> | LCN16_03044 | K03464                                       | muconolactone D-isomerase                          |
|                        | <i>benA</i> | LCN16_03046 | K05549                                       | benzoate/toluato 1,2-oxygenase alpha subunit       |
|                        | <i>benB</i> | LCN16_03047 | K05550                                       | benzoate/toluato 1,2-oxygenase beta subunit        |
|                        | <i>benC</i> | LCN16_03048 | K05784                                       | benzoate/toluato 1,2-oxygenase reductase subunit   |
|                        | <i>benD</i> | LCN16_03049 | K05783                                       | dihydroxycyclohexadiene carboxylate dehydrogenase  |
|                        | <i>pcaD</i> | LCN16_03042 | K01055                                       | 3-oxoadipate enol-lactonase                        |
|                        | <i>pcaG</i> | LCN16_02516 | K00448                                       | protocatechuate 3,4-dioxygenase alpha subunit      |
| <i>pcaH</i>            | LCN16_02515 | K00449      | protocatechuate 3,4-dioxygenase beta subunit |                                                    |
| <i>pcaB</i>            | LCN16_02519 | K01857      | 3-carboxy-cis, cis-muconate cycloisomerase   |                                                    |

|                                  |               |             |        |                                                             |
|----------------------------------|---------------|-------------|--------|-------------------------------------------------------------|
|                                  | <i>pcaC</i>   | LCN16_01415 | K01607 | 4-carboxymuconolactone decarboxylase                        |
|                                  | <i>pcaC</i>   | LCN16_02518 | K01607 | 4-carboxymuconolactone decarboxylase                        |
|                                  | <i>pobA</i>   | LCN16_02520 | K00481 | p-hydroxybenzoate 3-monoxygenase                            |
|                                  | <i>hpaB</i>   | LCN16_00566 | K00483 | 4-hydroxyphenylacetate 3-monoxygenase                       |
|                                  | <i>hpaC</i>   | LCN16_00567 | K00484 | flavin reductase                                            |
|                                  | <i>hpaD</i>   | LCN16_00560 | K00455 | 3,4-dihydroxyphenylacetate 2,3-dioxygenase                  |
|                                  | <i>hpaE</i>   | LCN16_00559 | K00151 | 5-carboxymethyl-2-hydroxymuconic-semialdehyde dehydrogenase |
|                                  | <i>hpaF</i>   | LCN16_00561 | K01826 | 5-carboxymethyl-2-hydroxymuconate isomerase                 |
|                                  | <i>hpaG</i>   | LCN16_00557 | K05921 | 2-hydroxyhepta-2,4-diene-1,7-dioate isomerase               |
|                                  | <i>hapG</i>   | LCN16_00558 | K05921 | 2-hydroxyhepta-2,4-diene-1,7-dioate isomerase               |
| <b>Secretion system proteins</b> |               |             |        |                                                             |
| T1SS                             | <i>tolC</i>   | LCN16_04212 | K12340 | outer membrane protein                                      |
|                                  | <i>hasD</i>   | LCN16_01553 | K12536 | bacterial exporter for protease/lipase                      |
|                                  | <i>hasE</i>   | LCN16_01554 | K12537 | protease secretion system                                   |
|                                  | <i>hasF</i>   | LCN16_01555 | K12538 | protease secretion system                                   |
| T2SS                             | <i>gspS</i>   | LCN16_03133 | K02465 | general secretion pathway protein S                         |
| T5SS                             | <i>ssp</i>    | LCN16_04654 | K12685 | subtilase-type serine protease                              |
|                                  | <i>apeE</i>   | LCN16_00070 | K12686 | outer membrane lipase/esterase                              |
| Sec-dependent                    | <i>secA</i>   | LCN16_00698 | K03070 | preprotein translocase subunit                              |
|                                  | <i>secB</i>   | LCN16_04731 | K03071 | preprotein translocase subunit                              |
|                                  | <i>secD</i>   | LCN16_00975 | K03072 | preprotein translocase subunit                              |
|                                  | <i>secE</i>   | LCN16_00287 | K03073 | preprotein translocase subunit                              |
|                                  | <i>secF</i>   | LCN16_00976 | K03074 | preprotein translocase subunit                              |
|                                  | <i>secG</i>   | LCN16_00423 | K03075 | preprotein translocase subunit                              |
|                                  | <i>secM</i>   | LCN16_00697 | K13301 | secretion monitor                                           |
|                                  | <i>secY</i>   | LCN16_04471 | K03076 | preprotein translocase subunit                              |
|                                  | <i>ffh</i>    | LCN16_00786 | K03106 |                                                             |
|                                  | <i>ftsY</i>   | LCN16_00237 | K03110 |                                                             |
|                                  | <i>yajC</i>   | LCN16_00974 | K03210 | preprotein translocase subunit                              |
|                                  | <i>yidC</i>   | LCN16_00044 | K03217 |                                                             |
| Tat-independent                  | <i>tatA</i>   | LCN16_00270 | K03116 | sec-independent protein translocase protein                 |
|                                  | <i>tatA</i>   | LCN16_01113 | K03116 | sec-independent protein translocase protein                 |
|                                  | <i>tatB</i>   | LCN16_00271 | K03117 | sec-independent protein translocase protein                 |
|                                  | <i>tatC</i>   | LCN16_00272 | K03118 | sec-independent protein translocase protein                 |
| <b>Antimicrobial Compounds</b>   |               |             |        |                                                             |
|                                  | <i>hpmA</i>   | LCN16_04426 | K11016 | hemolysin                                                   |
|                                  | <i>hpmB</i>   | LCN16_04425 | K11017 | hemolysin activation/secretion protein                      |
|                                  | <i>hlyIII</i> | LCN16_04002 | K11068 | hemolysin III                                               |
|                                  | <i>plcC</i>   | LCN16_04159 | K01114 | phospholipase C                                             |

|                     |             |             |        |                                                 |
|---------------------|-------------|-------------|--------|-------------------------------------------------|
|                     | <i>tlh</i>  | LCN16_04200 | K11018 | thermostable hemolysin                          |
|                     |             | LCN16_00223 | K01406 | serralysin                                      |
|                     |             | LCN16_02109 |        | serralysin                                      |
|                     |             | LCN16_03865 |        | serralysin                                      |
|                     | <i>prnA</i> | LCN16_00326 |        | pyrrolnitrin                                    |
|                     | <i>prnB</i> | LCN16_00327 |        |                                                 |
|                     | <i>prnD</i> | LCN16_00329 |        |                                                 |
|                     | <i>kanB</i> | LCN16_03985 |        |                                                 |
|                     | <i>mdtL</i> | LCN16_03987 |        | Chroramphenicol resistance                      |
|                     | <i>ampC</i> | LCN16_02298 | K01467 | beta-Lactamase classe C                         |
|                     | <i>macA</i> | LCN16_01639 | K13888 | macrolide-specific efflux system                |
|                     |             | LCN16_01870 |        |                                                 |
|                     |             | LCN16_03524 |        |                                                 |
|                     | <i>macB</i> | LCN16_01640 | K05685 | macrolide transport system ATP-binding/permease |
|                     |             | LCN16_01869 |        |                                                 |
|                     |             | LCN16_03525 |        |                                                 |
|                     | <i>emrA</i> | LCN16_01268 | K03543 | multidrug efflux system                         |
|                     |             | LCN16_03848 |        |                                                 |
|                     | <i>acrA</i> | LCN16_01039 | K03585 |                                                 |
|                     |             | LCN16_02497 |        |                                                 |
|                     | <i>acrB</i> | LCN16_01038 | K18138 |                                                 |
|                     |             | LCN16_02496 |        |                                                 |
|                     |             | LCN16_02547 |        |                                                 |
|                     | <i>marC</i> | LCN16_02155 | K05595 | multiple antibiotic resistance                  |
|                     | <i>hcnA</i> | LCN16_01840 |        | Hydrogen cyanide synthase subunit HcnC          |
|                     | <i>hcnB</i> | LCN16_01841 |        | Hydrogen cyanide synthase subunit HcnA          |
|                     | <i>hcnC</i> | LCN16_01842 |        | Hydrogen cyanide synthase subunit HcnB          |
| Antifungal activity |             | LCN16_00148 | K01183 | chitinase [EC:3.2.1.14]                         |
|                     |             | LCN16_01150 | K01184 | chitinase [EC:3.2.1.14]                         |
|                     |             | LCN16_02767 | K01185 | chitinase [EC:3.2.1.14]                         |
|                     |             | LCN16_03549 | K01186 | chitinase [EC:3.2.1.14]                         |
